# Supplementary material
Source: publisher figshare collection journal article supplement (https://tandf.figshare.com/articles/dataset/_/6736115)
Supplement: Supplementary file 1 [file 1]

Archive with 5 entries (5 files):
- tbbb_a_1490169_sm7396.pdf
- tbbb_a_1490169_sm7395.pdf
- tbbb_a_1490169_sm7394.pdf
- tbbb_a_1490169_sm7393.pdf
- tbbb_a_1490169_sm7391.pdf
