# Supplementary material
Source: publisher figshare collection journal article supplement (https://tandf.figshare.com/articles/dataset/_/6736115)
Supplement: Supplementary file 1 [file 1 › tbbb_a_1490169_sm7391.pdf]

Supplemental table 1. <sup>1</sup>H-NMR data for Compound 1 and ergosterol in reference [22] (in CDCl<sub>3</sub>).

| Position | Compound 1                                         | Reference data [22]                                |
|----------|----------------------------------------------------|----------------------------------------------------|
|          | $\delta_{\text{H}}$ (multiplicity, <i>J</i> in Hz) | $\delta_{\text{H}}$ (multiplicity, <i>J</i> in Hz) |
| 3        | 3.64 (1H, m)                                       | 3.65 (1H, m)                                       |
| 6        | 5.57 (1H, m)                                       | 5.57 (1H, m)                                       |
| 7        | 5.39 (1H, m)                                       | 5.38 (1H, m)                                       |
| 18       | 0.63 (3H, s)                                       | 0.63 (3H,s)                                        |
| 19       | 0.95 (3H, s)                                       | 0.95 (3H, s)                                       |
| 21       | 1.04 (3H, d, 6.5)                                  | 1.04 (3H, d, 7.0)                                  |
| 22 or 23 | 5.18 (1H, dd, 7.0, 15.0)                           | 5.20 (1H, dd, 7.5, 15.5)                           |
| 23 or 22 | 5.22 (1H, dd, 7.0, 15.0)                           | 5.22 (1H, dd, 7.0, 15.5)                           |
| 26 or 27 | 0.82 (3H, d, 7.0)                                  | 0.82 (3H, d, 6.5)                                  |
| 27 or 26 | 0.84 (3H, d, 7.5)                                  | 0.84 (3H, d, 6.5)                                  |
| 28       | 0.92 (3H, d, 7.0)                                  | 0.92 (3H, d,7.0)                                   |
