# Supplementary material
Source: publisher figshare collection journal article supplement (https://tandf.figshare.com/articles/dataset/_/6736115)
Supplement: Supplementary file 1 [file 1 › tbbb_a_1490169_sm7393.pdf]

Supplemental table 2. <sup>1</sup>H- and <sup>13</sup>C-NMR data for Compound 2 and MEDD in reference [23] (in CDCl<sub>3</sub>).

| Position | Compound 2     |                                               | Reference data [23] |                                               |
|----------|----------------|-----------------------------------------------|---------------------|-----------------------------------------------|
|          | δ <sub>C</sub> | δ <sub>H</sub> (multiplicity, <i>J</i> in Hz) | δ <sub>C</sub>      | d <sub>H</sub> (multiplicity, <i>J</i> in Hz) |
| 1        | 32.8           |                                               | 33.5                |                                               |
| 2        | 30.9           |                                               | 31.6                |                                               |
| 3        | 67.9           | 4.08 (m)                                      | 68.5                | 4.10 (m)                                      |
| 4        | 39.4           |                                               | 40.1                |                                               |
| 5        | 76.4           |                                               | 77.0                |                                               |
| 6        | 82.4           | 3.17 (d, 5.0)                                 | 83.1                | 3.20 (d, 4.5)                                 |
| 7        | 115.0          | 5.40 (m)                                      | 115.7               | 5.40 (m)                                      |
| 8        | 143.7          |                                               | 144.4               |                                               |
| 9        | 43.9           |                                               | 44.6                |                                               |
| 10       | 37.3           |                                               | 38.0                |                                               |
| 11       | 22.2           |                                               | 22.9                |                                               |
| 12       | 39.6           |                                               | 40.3                |                                               |
| 13       | 43.9           |                                               | 44.6                |                                               |
| 14       | 55.0           |                                               | 55.7                |                                               |
| 15       | 22.9           |                                               | 23.6                |                                               |
| 16       | 28.0           |                                               | 28.6                |                                               |
| 17       | 56.0           |                                               | 56.7                |                                               |
| 18       | 12.3           | 0.60 (s)                                      | 13.0                | 0.58 (s)                                      |
| 19       | 18.4           | 1.00 (s)                                      | 19.1                | 0.95 (s)                                      |
| 20       | 40.4           |                                               | 41.0                |                                               |
| 21       | 19.7           | 1.02 (d, 6.5)                                 | 20.4                | 0.97 (d, 6.5)                                 |
| 22       | 135.5          | 5.16 (dd, 8.5, 15.5)                          | 136.1               | 5.15 (dd, 8.0, 16.0)                          |
| 23       | 132.1          | 5.23 (dd, 7.5, 15.5)                          | 132.8               | 5.25 (dd, 7.5, 16.0)                          |
| 24       | 42.8           |                                               | 43.5                |                                               |
| 25       | 33.1           |                                               | 33.8                |                                               |
| 26       | 20.0           | 0.83 (d, 7.5)                                 | 20.7                | 0.81 (d, 7.0)                                 |
| 27       | 21.1           | 0.83 (d, 7.5)                                 | 21.8                | 0.82 (d, 7.0)                                 |
| 28       | 17.6           | 0.92 (d, 7.0)                                 | 18.3                | 0.89 (d, 6.5)                                 |
| 29       | 58.4           | 3.40 (s)                                      | 59.0                | 3.40 (s)                                      |
