# Supplementary material
Source: publisher figshare collection journal article supplement (https://tandf.figshare.com/articles/dataset/_/6736115)
Supplement: Supplementary file 1 [file 1 › tbbb_a_1490169_sm7394.pdf]

Supplemental table 3.  $^1\text{H}$ - and  $^{13}\text{C}$ -NMR data for Compound 3 and 6-OXO in reference [24, 25] (in  $\text{CDCl}_3$  except for  $\delta_{\text{C}}$  in reference data in pyridine- $d_5$ ).

| Position | Compound 3          |                                               | Reference data of 6-OXO [24, 25] |                                               |
|----------|---------------------|-----------------------------------------------|----------------------------------|-----------------------------------------------|
|          | $\delta_{\text{C}}$ | $\delta_{\text{H}}$ (multiplicity, $J$ in Hz) | $\delta_{\text{C}}$              | $\delta_{\text{H}}$ (multiplicity, $J$ in Hz) |
| 1        | 29.5                |                                               | 31.7                             |                                               |
| 2        | 29.6                |                                               | 31.2                             |                                               |
| 3        | 66.8                | 4.03 (m)                                      | 67.0                             | 4.04 (m)                                      |
| 4        | 35.8                |                                               | 39.1                             |                                               |
| 5        | 77.1                |                                               | 77.3                             |                                               |
| 6        | 198.0               |                                               | 200.0                            |                                               |
| 7        | 119.0               | 5.66 (m)                                      | 120.6                            | 5.66 (br)                                     |
| 8        | ND                  |                                               | 164.0                            |                                               |
| 9        | 43.2                |                                               | 44.3                             |                                               |
| 10       | 39.7                |                                               | 41.2                             |                                               |
| 11       | 21.2                |                                               | 22.1                             |                                               |
| 12       | 38.1                |                                               | 37.7                             |                                               |
| 13       | 44.1                |                                               | 44.6                             |                                               |
| 14       | 55.1                |                                               | 55.8                             |                                               |
| 15       | 21.7                |                                               | 22.8                             |                                               |
| 16       | 27.1                |                                               | 28.2                             |                                               |
| 17       | 55.3                |                                               | 56.0                             |                                               |
| 18       | 12.0                | 0.62 (s)                                      | 12.7                             | 0.61 (s)                                      |
| 19       | 16.9                | 0.96 (s)                                      | 16.4                             | 0.96 (s)                                      |
| 20       | 39.6                |                                               | 40.6                             |                                               |
| 21       | 20.4                | 1.03 (d, 6.5)                                 | 21.3                             | 1.04 (d, 6.6)                                 |
| 22       | 134.3               | 5.18 (dd, 8.5, 15.5)                          | 135.8                            | 5.15 (dd, 7.6, 15.2)                          |
| 23       | 131.8               | 5.22 (dd, 7.5, 15.5)                          | 132.4                            | 5.25 (dd, 7.1, 15.2)                          |
| 24       | 42.1                |                                               | 43.1                             |                                               |
| 25       | 32.3                |                                               | 33.3                             |                                               |
| 26       | 19.2                | 0.84 (d, 7.5)                                 | 20.1                             | 0.82 (d, 6.8)                                 |
| 27       | 18.9                | 0.82 (d, 7.5)                                 | 19.8                             | 0.84 (d, 6.8)                                 |
| 28       | 15.7                | 0.92 (d, 7.0)                                 | 17.8                             | 0.92 (d, 6.8)                                 |

Abbreviation: ND, not detected
