# Supplementary material
Source: publisher figshare collection journal article supplement (https://tandf.figshare.com/articles/dataset/_/6736115)
Supplement: Supplementary file 1 [file 1 › tbbb_a_1490169_sm7395.pdf]

## Supplemental figure 1

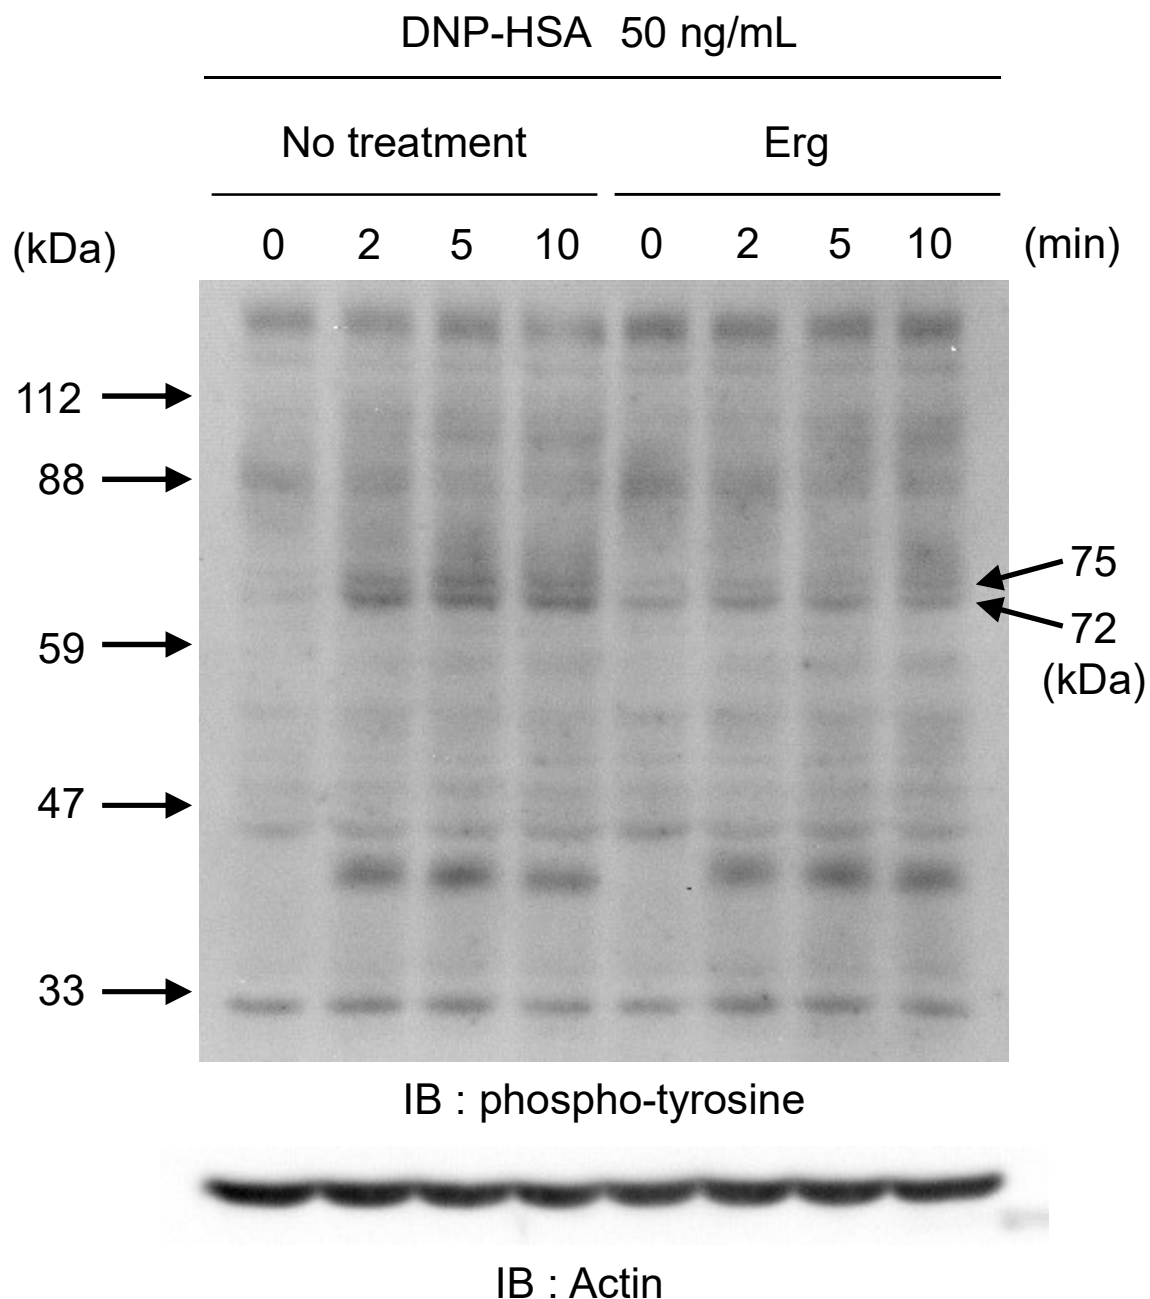

Supplemental figure 1. Effect of ergosterol on antigen-induced global tyrosine phosphorylation of whole proteins.

IgE-sensitized RBL-2H3 cells pretreated with or without ergosterol (Erg, 50  $\mu$ M) were stimulated with DNP-HSA (50 ng/ml) for the indicated times. Cell lysates were blotted with anti-phosphotyrosine antibody. The arrowheads on the left side indicated the position of the molecular weight markers and the right side indicated the molecular weight of the target proteins calculated from the calibration curve obtained by the molecular weight markers.
