# Supplementary material
Source: publisher figshare collection journal article supplement (https://tandf.figshare.com/articles/dataset/_/6736115)
Supplement: Supplementary file 1 [file 1 › tbbb_a_1490169_sm7396.pdf]

## Supplemental figure 2

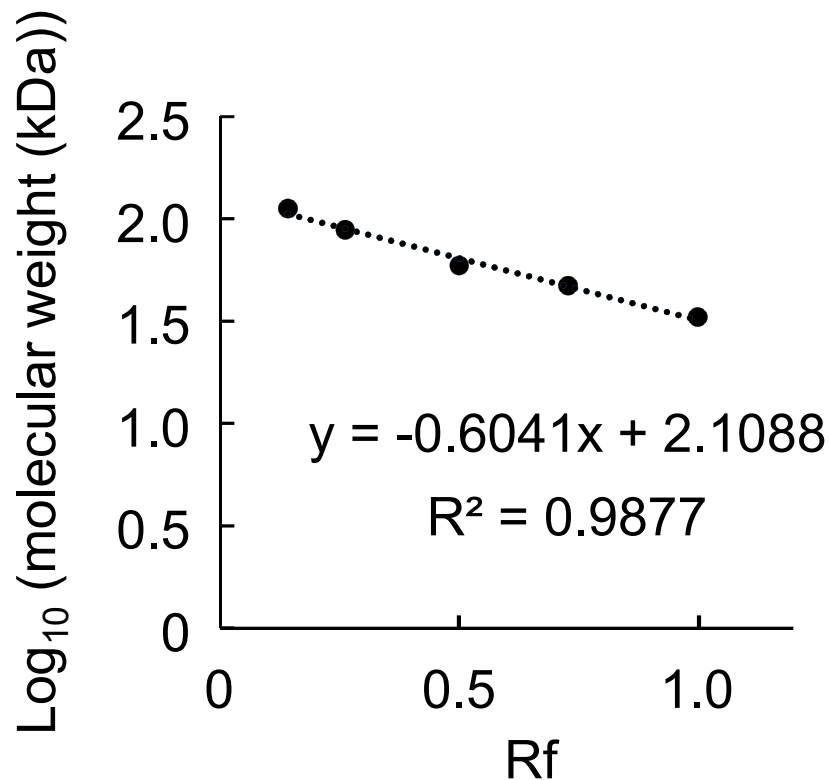

Supplemental figure 2. Calibration curve prepared from the migration distance of the molecular weight markers.

The retardation factor (Rf) of the molecular weight markers were determined using the following equation:  $Rf = \text{migration distance of the protein} / \text{migration distance of the lowest molecular weight marker (33 kDa)}$ . The target proteins in figure 6 and supplemental figure 1 has the Rf of 0.41 and 0.39. Using the equation, The molecular weight were estimated to be 72 and 75 kDa.
